# Supplementary material for: A broadband aggregation-independent plasmonic absorber for highly efficient solar steam generation
Source: Royal Society of Chemistry journal article supplement (doi:10.1039/d0ta01980a), 2020-01-01
Supplement: d0ta01980a1.pdf [file d0ta01980a1.pdf]

## **Supporting Information**

### **Broadband Aggregation-Independent Plasmonic Absorber for Highly Efficient Solar Steam Generation**

Zhongming Huang, Shengliang Li\*, Xiao Cui, Yingpeng Wan, Yafang Xiao, Shuang Tian, Hui Wang, Xiaozhen Li, Qi Zhao, and Chun-Sing Lee\*

Center of Super-Diamond and Advanced Films (COSDAF) and Department of Chemistry, City University of Hong Kong, Hong Kong SAR, 999077 P. R. China. \*E-mail: [lishengliang@iccas.ac.cn](mailto:lishengliang@iccas.ac.cn), [apcslee@cityu.edu.hk](mailto:apcslee@cityu.edu.hk)

# **Table of contents**

**Section 1. Methods**

**Section 2. Characterizations**

**Section 3. Calculate energy efficiency (  $\eta$  ) for solar steam generation**

**Section 4. Additional table and figures**

**Section 5. References**

## Section 1. Methods

*Materials:* L-cysteine (L-Cys) was obtained from Sigma Aldrich (USA),  $\text{HAuCl}_4$  was purchased from J&K chemical (Beijing, China). Ascorbic acid, silver nitrate, sodium borohydride and sodium stearate were obtained from Sigma Aldrich (USA). Hexadecyl trimethyl ammonium bromide (CTAB) and sodium oleate (NaOL, >97.0%) were purchased from J&K chemical (Beijing, China). Hydrochloric acid (HCl, 37 wt%) was purchased from Sigma Aldrich (USA). PVA ( $M_w=13000-23000$ ) were purchased from Sigma Aldrich (USA). Unless otherwise special declared, all chemicals were used without further purification

*Preparation of nano-trepang:*

### *1 Synthesis of AuNR0:*

Gold nanorods were prepared by a standard seed mediated method.<sup>[1]</sup> Firstly, gold seed solution was prepared by adding 25  $\mu\text{L}$  10 mM  $\text{HAuCl}_4$  into 1 mL 0.1 M CTAB solution, then 60  $\mu\text{L}$  fresh prepared ice cold  $\text{NaBH}_4$  solution (20 mM) was quickly injected into the above CTAB solution, the mixture was placed on magnetic stirring for 2 mins then the seed solution was aged at 37 °C for 2 hours. The certain aspect ratio gold nanorods were prepared as follow: 140 mg CTAB was dissolved into 5 mL deionized water, then the solution was placed at 60 °C after 24.6 mg NaOL was added into the solution. The solution was allowed to cool down to room temperature and keep undisturbed, then 5 mL  $\text{HAuCl}_4$  (1 mM) solution and 192  $\mu\text{L}$   $\text{AgNO}_3$  (10 mM) were mixed with the solution, after that, 72  $\mu\text{L}$  hydrochloric acid (HCl, 37 wt. % in water)

was added in order to adjust the pH. After stirring at 1000 rpm for 10 mins, 25  $\mu$ l (0.064 M) ascorbic acid was introduced into the mixture. Finally, 16  $\mu$ L of as-prepared seed solution was added into the growth solution, then the growth solution was placed at 37 °C overnight. The resultant gold nanorods solution was purified by centrifugation at 8,000 rpm for 20 mins followed by removal of the supernatant. The gold nanorods absorption spectra was measured by ultraviolet spectrometry (Shimadu-1700, Japan).

## 2 *Synthesis of nano-trepang:*

Nano-trepang were synthesized as follow: 1.0 mL of 0.1 M CTAB solution was added into 3.8 mL deionized water. Then 0.2 mL of 10 mM HAuCl<sub>4</sub> was introduced into the mixture and the resultant mixture solution was stirred for 5 mins. 0.475 mL of ascorbic acid (0.1 M) was mixed into the solution to reduce Au<sup>3+</sup>, then 0.5 mL of diluted AuNR0 was added into the solution and after stirred at 1000 rpm for 30 s, 10  $\mu$ L of L-Cysteine (1 mM) was quickly injected into the mixture solution. After another 60 mins of stirring at 1000 rpm, the prepared gold nanoparticles were isolated by centrifugated at 5000 rpm for 5 mins and washed with DI water for three times.

*Fabrication of plasmonic aerogel network (PAN):* Hybrid hydrogel was prepared as following: 1 g PVA (Mw=13000-23000) was dissolved into DI water (10 mL), then the as prepared PVA solution was mixed with 0.125 mL glutaraldehyde (10 % in DI water) thoroughly by sonication for 30 mins. Then 7 mL prepared nano-trepang (350  $\mu$ g/mL) and 2 mL HCl solution (1.2 M) were added into the mixed PVA solution, finally 1 mL water was added into the mixture solution. The gelation was carried out for 3 h at room temperature, and the obtained hybrid hydrogel was immersed into DI water at least 8 h

before obtaining pure hybrid hydrogel. -20 °C freezer was used to freeze the prepared hybrid hydrogel and then thawed in water bath at 37 °C. The freeze-thawed process was repeated at least 10 times. Then a lyophilization process was proceeded to obtain the PAN. The obtained PAN was reduced by hydrazine aqueous solution at 70 °C for 8 h. Finally, the PAN was washed with deionized water three times to remove extra hydrazine and followed by freeze-drying for the following experiments.

*Experimental Setup for Steam Generation:* To evaluate photothermal performance of the as prepared PAN, the water evaporation experiment was carried out at room temperature, the PAN (with a diameter of 28 mm and thickness of 9 mm) was allowed to float on the surface of bulk water in a 25 mL beaker under solar simulator with radiation intensity of 1 kW m<sup>-2</sup> (1 sun). The solar simulator was configured with an optical filter for the standard AM 1.5 G spectrum (Newport). Once the simulated sunlight was on, the water mass change was immediately monitored by a high-accuracy electrical balance every 5 min (Shimadzu, AUW220D, 0.01 mg in accuracy). The real-time temperature change was recorded by a FLUKE Ti400 infrared camera. Temperature data and infrared images were exported by a software (SmartView 4.3) connected to a desktop computer for the calculating the steam generation rate and efficiency. The respective evaporation rates under varied simulated solar irradiation density were calculated to identify the effect of solar irradiation on evaporation rates.

Evaporation rate in the group set without simulated solar irradiation was treat as blank control, the evaporation rate in experimental group was revised by subtracted the blank control. The real sea water was obtained from Tsim Sha Tsui, Kowloon, Hong

Kong (10:00, August 10, 2019). All the sea water used in the following experiments were treated with 0.22  $\mu\text{m}$  filter membrane to exclude potential bacterial and other solid impurities. All the experiments were typically carried out at an ambient temperature of  $\approx 22^\circ\text{C}$  and a humidity of  $\approx 55\%$ .

## **Section 2. Characterizations**

Dynamic light scattering (DLS) measurements and *Zeta* potentials were carried out with a Malvern Zeta-sizer instrument. Sizes and morphologies of AuNRs were investigated using scanning electron microscopy (SEM, Philips XL-30 FEG) and transmission electron microscope (TEM; Philips Technai 12). UV-Vis absorption was recorded with UV-vis spectrophotometer (Shimadzu 1700). Concentration of prepared nano-trepang was determinate by ICP-OES (Optima 8000, PerkinElmer, USA). Infrared images were captured by infrared camera (Fluke Ti400, USA). All the obtained data were processed by Origin 8.5.

## **Section 3. Calculate energy efficiency ( $\eta$ ) for solar steam generation**

The corresponding energy efficiency ( $\eta$ ) for solar to steam generation can then be calculated using the following formula:

$$\eta = \frac{mh_v}{C_{opt}P_o} \quad (1)$$

where  $m$  is the calibrated mass change rate under solar illumination,  $h_v$  is the water vaporization enthalpy in PAN,  $P_0$  is the solar irradiation density ( $1 \text{ kW m}^{-2}$ ), and  $C_{opt}$  is the optical concentration on the evaporator surface. According to the previous research, the vaporization enthalpy of water confined in the PAN molecular mesh is smaller than that of bulk water. <sup>[1,2]</sup> The solar to vapor energy efficiency ( $\eta$ ) of the PAN was about 79.3 %.

#### Section 4. Additional table and figures

**Table S1.** Summary the dimension of AuNR at different growth stage

|              | Length (nm) | Width (nm) | Aspect ratio |
|--------------|-------------|------------|--------------|
| AuNR0        | 72.2        | 18.2       | 4.0          |
| AuNR1        | 125.1       | 61.3       | 2.0          |
| AuNR2        | 192.3       | 104.0      | 1.9          |
| Nano-trepang | 272.3       | 165.5      | 1.7          |

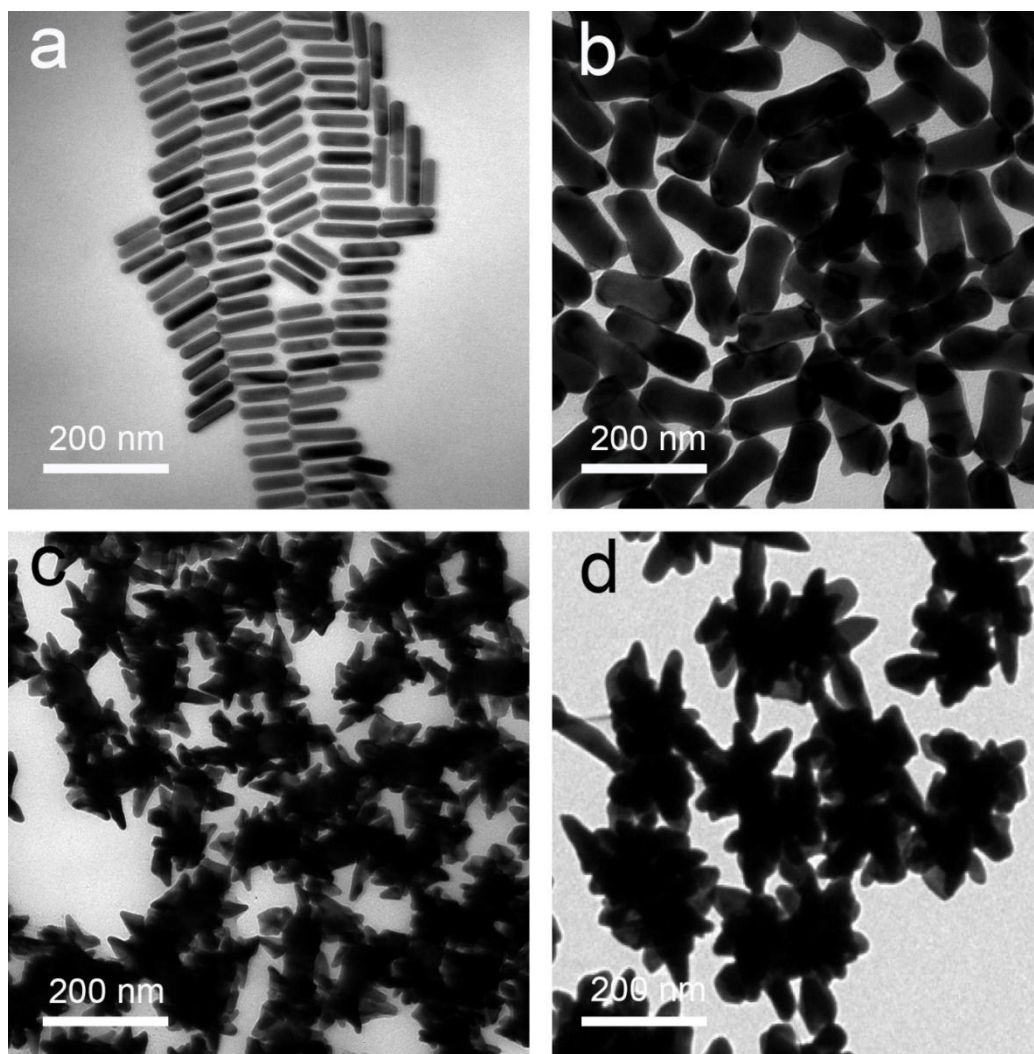

**Fig. S1** (a) TEM image of AuNR0 (Initial gold nanorods). TEM images of (b) AuNR1, (c) AuNR2, (d) Nano-trepang.



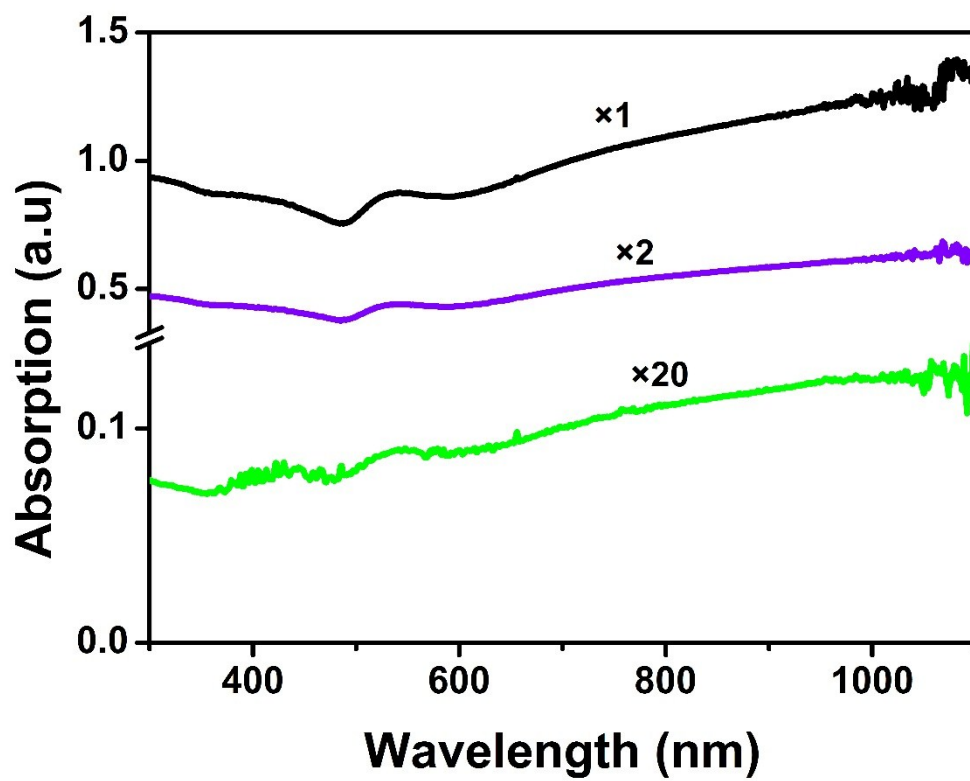

**Fig. S2** The absorption spectrum changes of nano-trepang (200  $\mu\text{g/ml}$ ) after diluted 2 times, 20 times respectively.

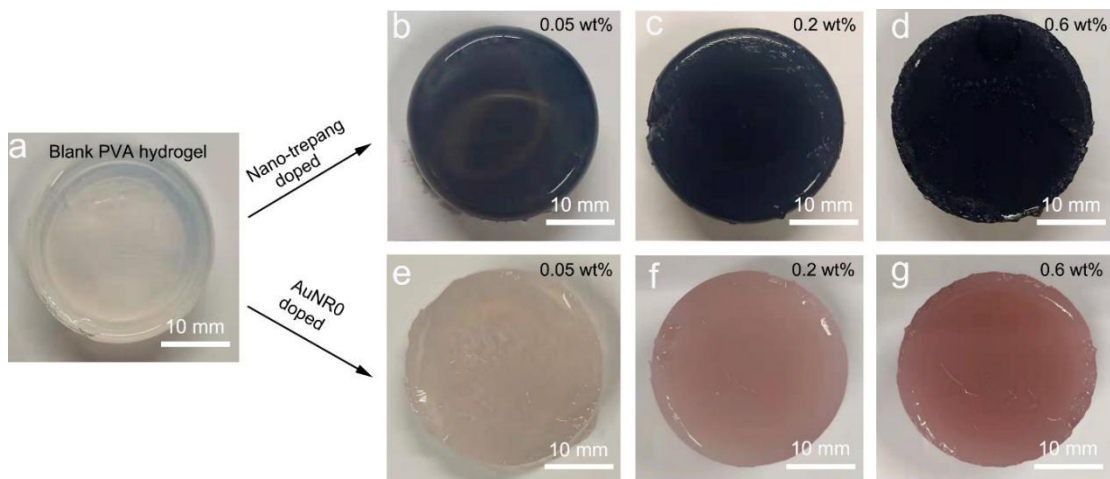

**Fig.S3** (a) Blank PVA hydrogel. PVA hybrid hydrogels doped with (b) 0.05; (c) 0.2; and (d) 0.6 wt% of nano-trepang. PVA hybrid hydrogels doped with (e) 0.05; (f) 0.2; and (g) 0.6 wt% of AuNR0.

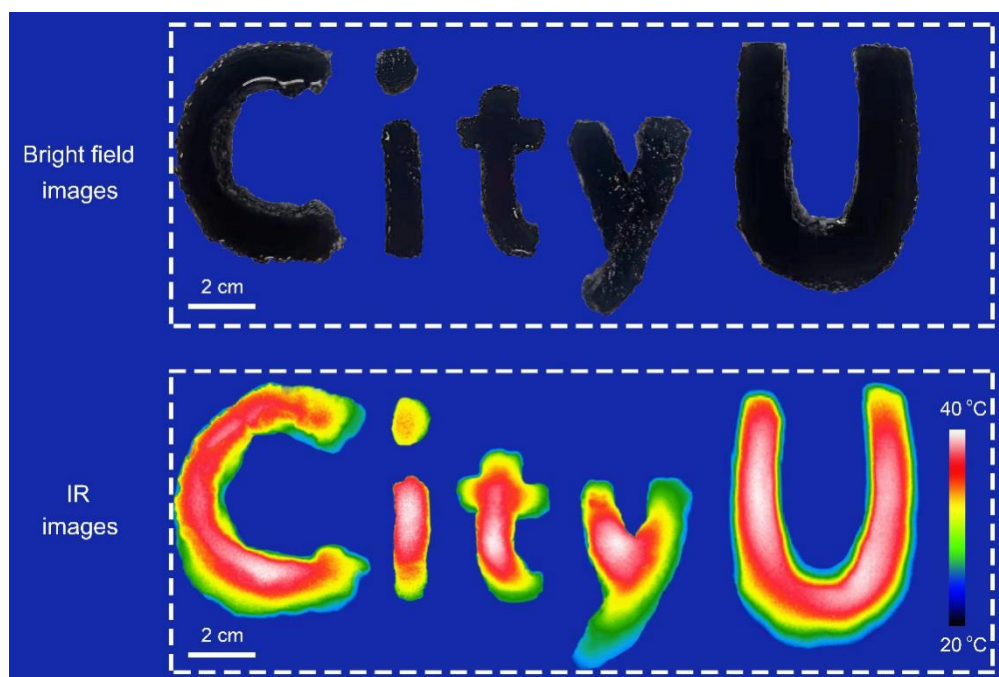

**Fig. S4** Bright field images and corresponding IR images under solar irradiation of real pattern of PVA hybrid hydrogel.

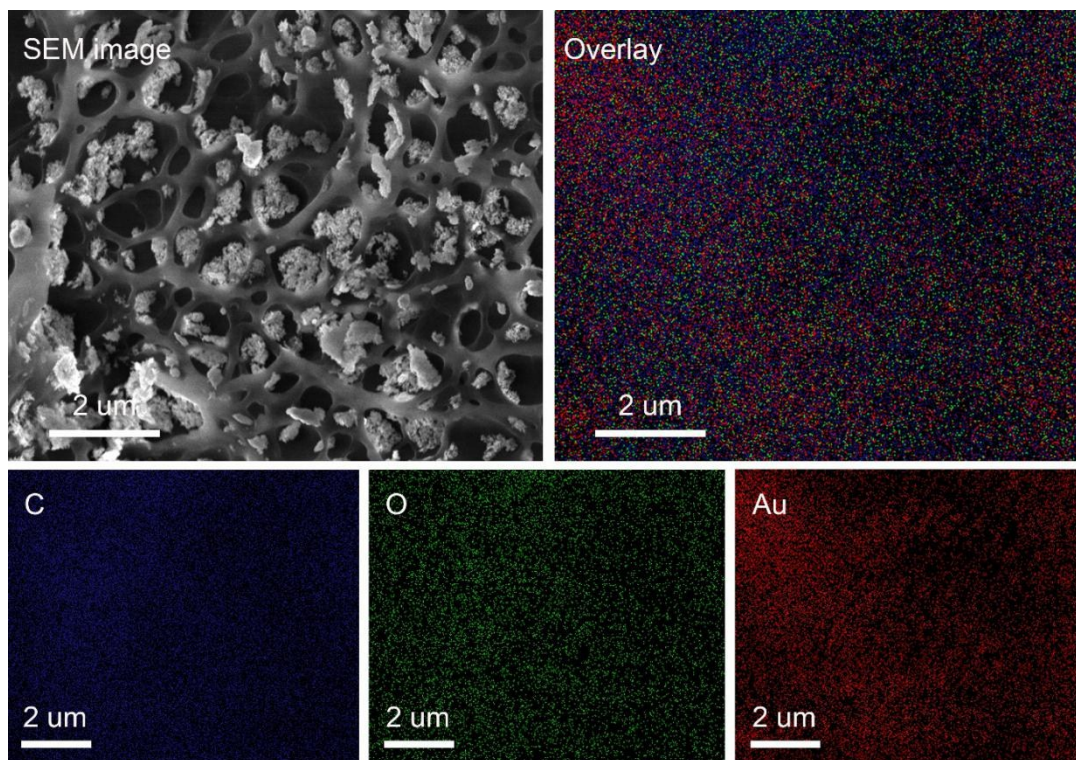

**Fig. S5** Elemental mapping images of selected section of PAN-3.

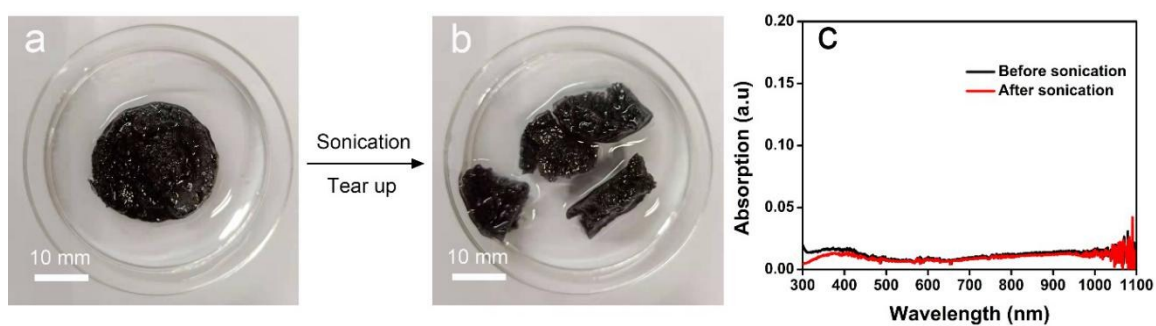

**Fig. S6** (a) PAN was soaked in water. (b) PAN was torn into small pieces before undergoing an overnight sonication. (c) The absorption spectrum of soak solution before and after overnight sonication.

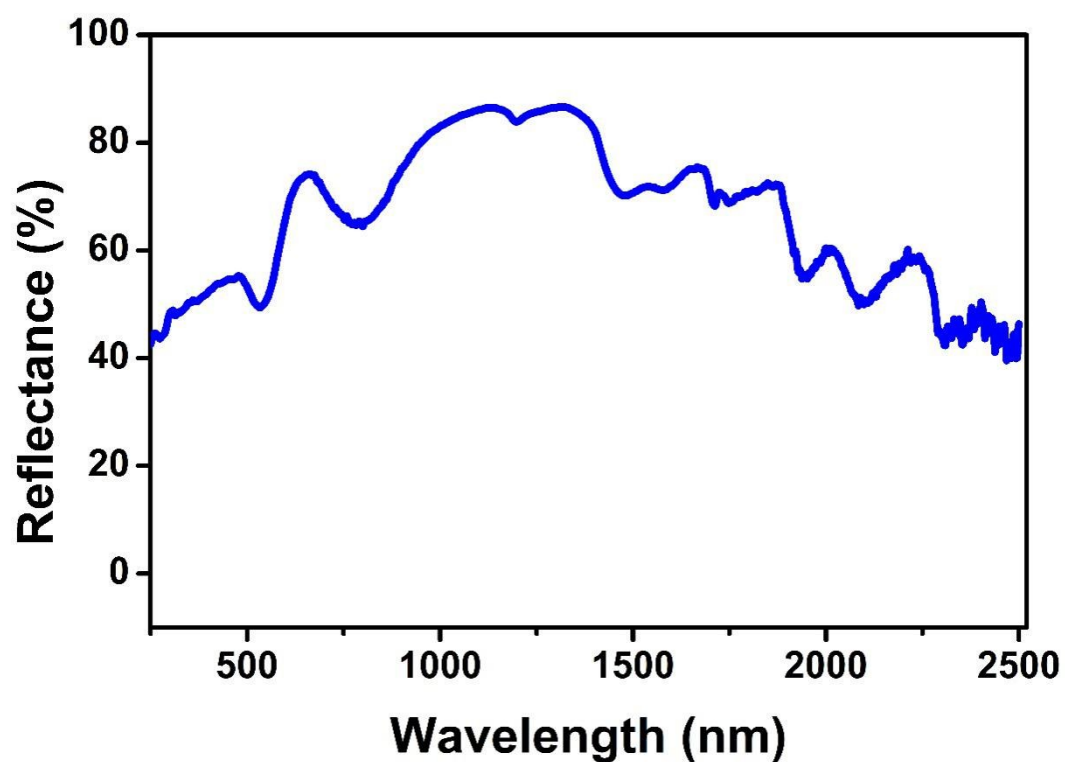

**Fig. S7** Reflectance spectra of PVA hybrid hydrogel doped with 0.6 wt% AuNR0.

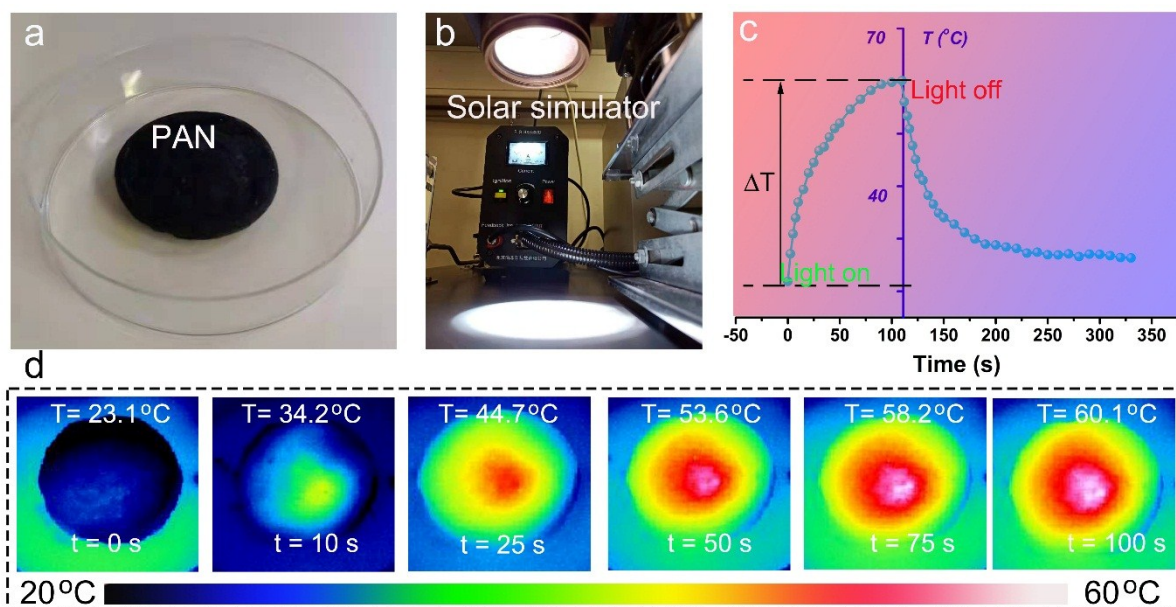

**Fig. S8** (a) Image of the prepared PAN. (b) Simulated solar resource setup. (c) The temperature changes with light on and further temperature initialization after lighting off. (d) IR photographs of the PAN under solar irradiation (solar irradiation density:  $3 \text{ kW m}^{-2}$ , AM1.5 G, time: 110 s).



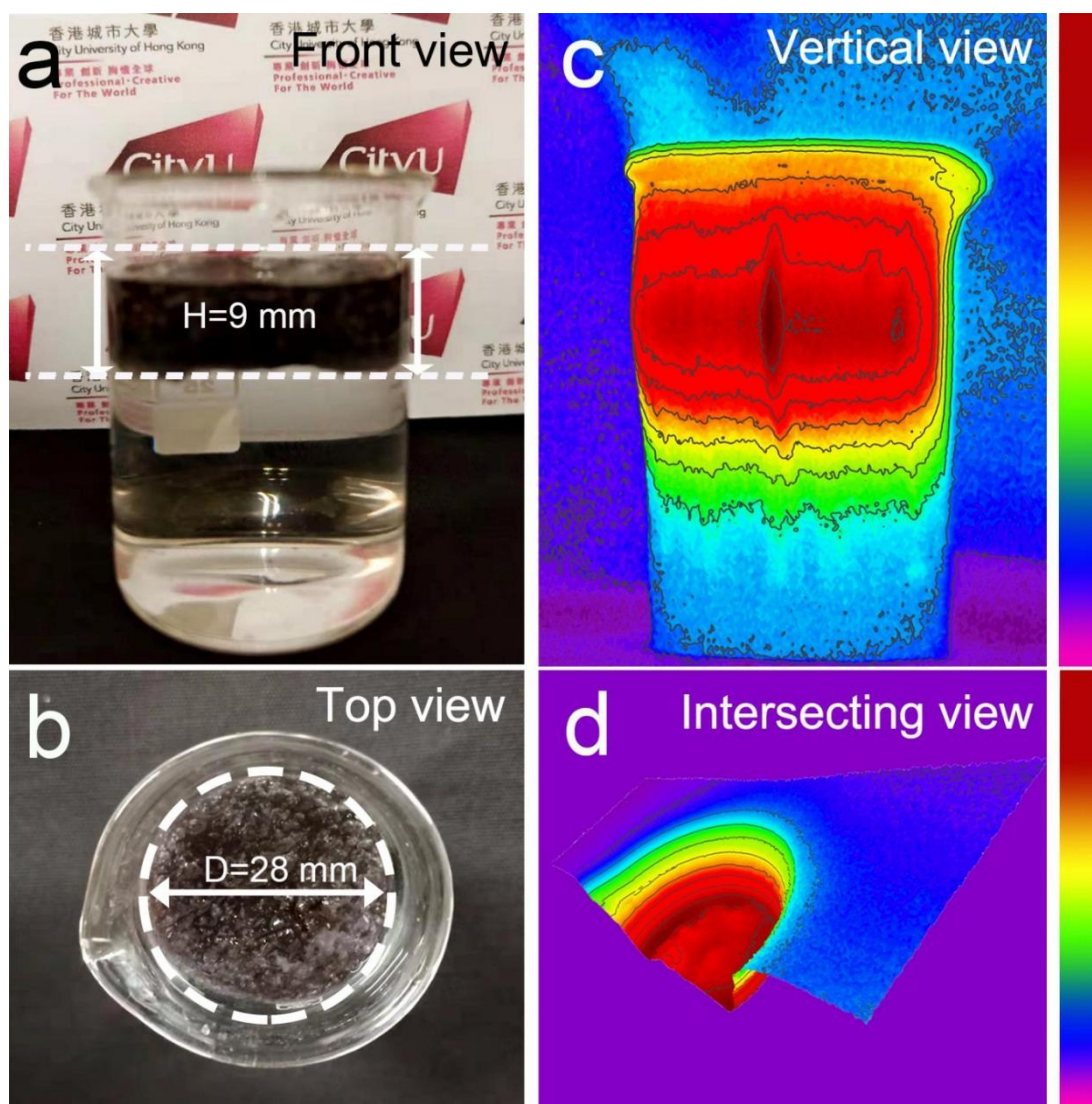

**Fig. S9** (a, b) Front and top view images of the prepared PAN floating on bulk water in a beaker. (c, d) Vertical and intersecting view of 3D temperature profiles under solar irradiation (1 sun).

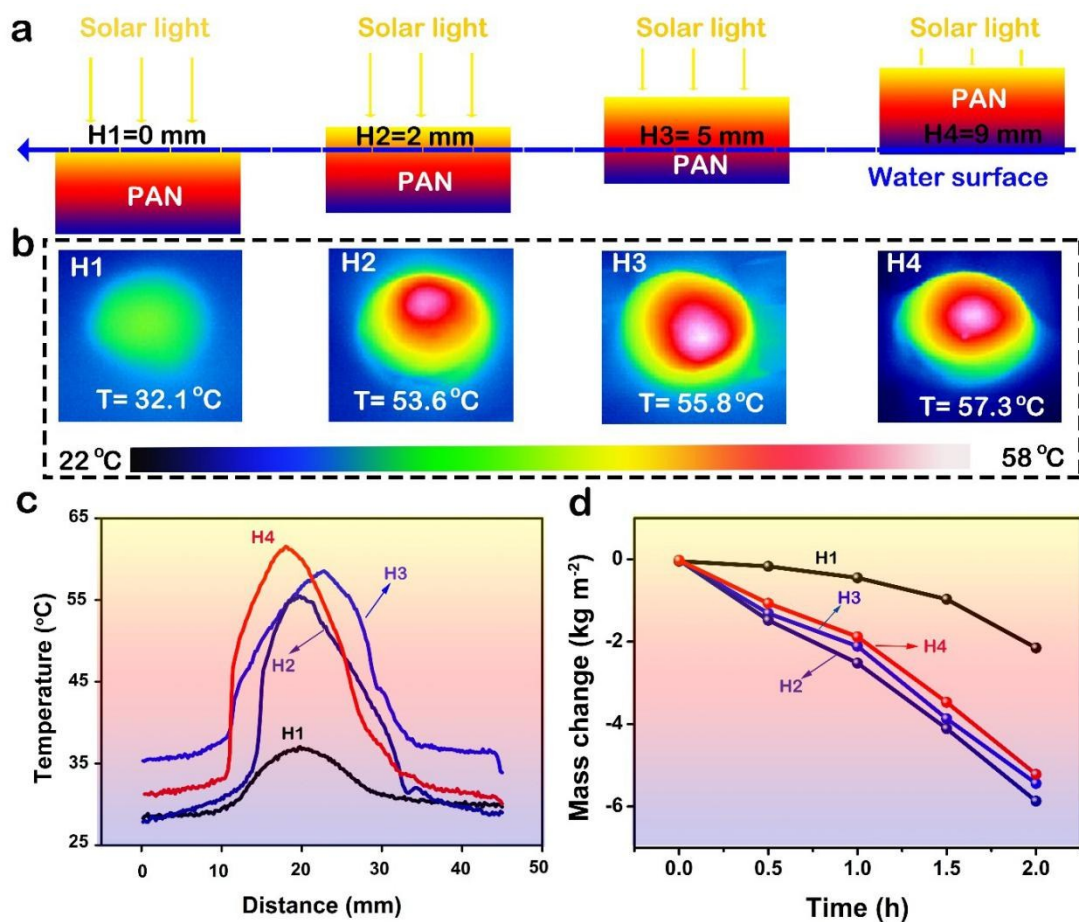

**Fig. S10** (a) Schematic illustration of PAN-3 under different height configuration with solar light irradiation. (b) IR images of PAN-3 under solar light irradiation under various height configuration. (c) The surface temperature profiles of PAN-3 under different height configuration. (d) Mass change under different height configuration.



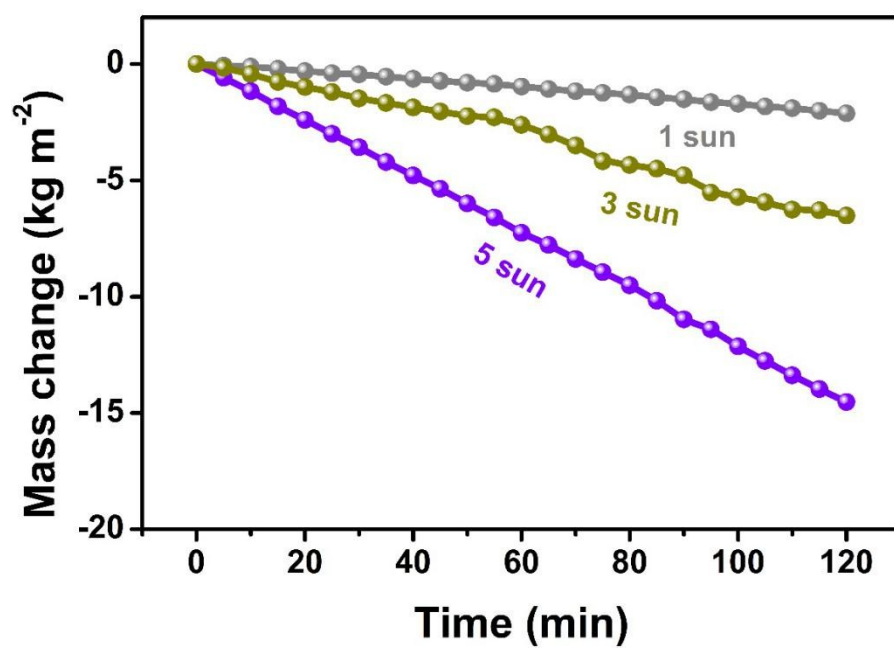

**Fig. S11** The mass loss of water for PAN-1 over time at various solar irradiation density.

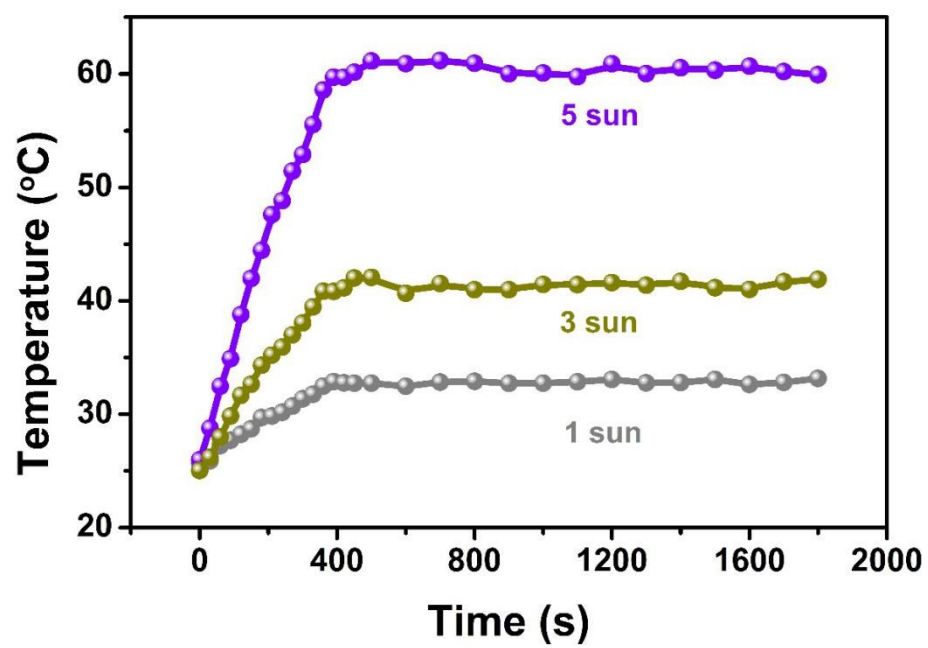

**Fig. S12** The change of surface temperature of PAN-1 with time under different solar irradiation density.

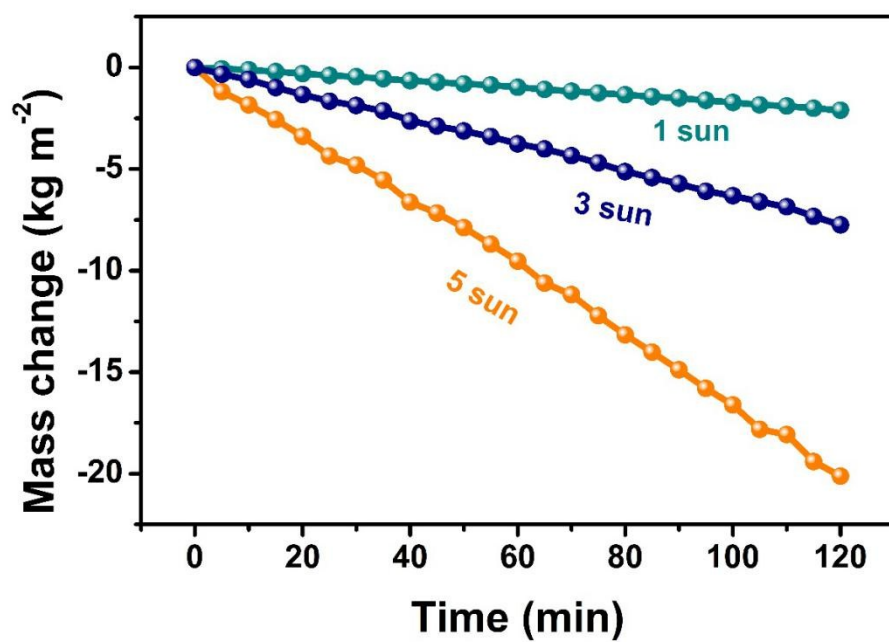

**Fig. S13** The mass loss of water for PAN-2 over time at various solar irradiation density.

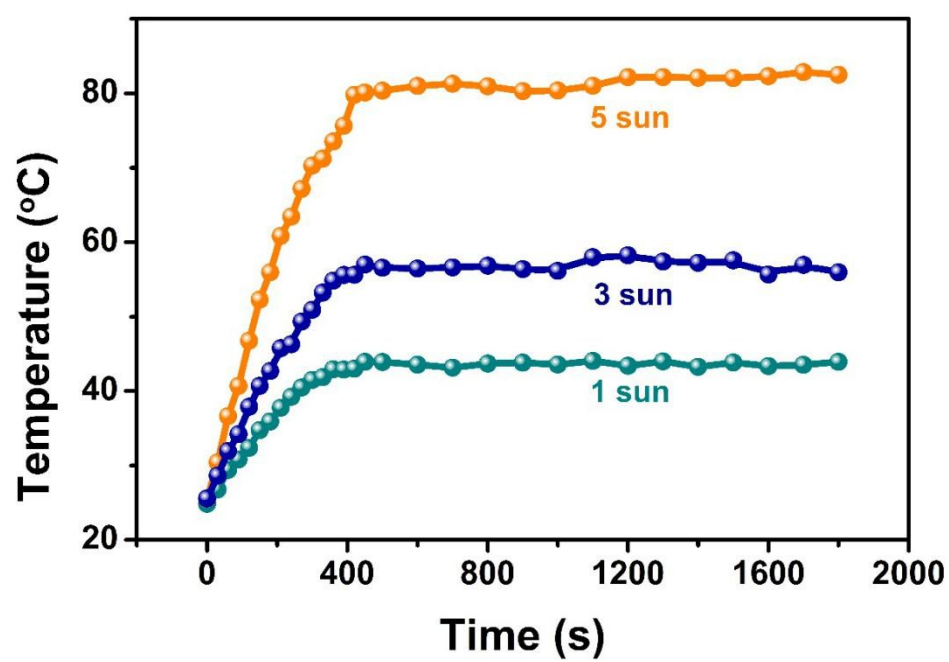

**Fig. S14** The change of surface temperature of PAN-2 with time under different solar irradiation density.

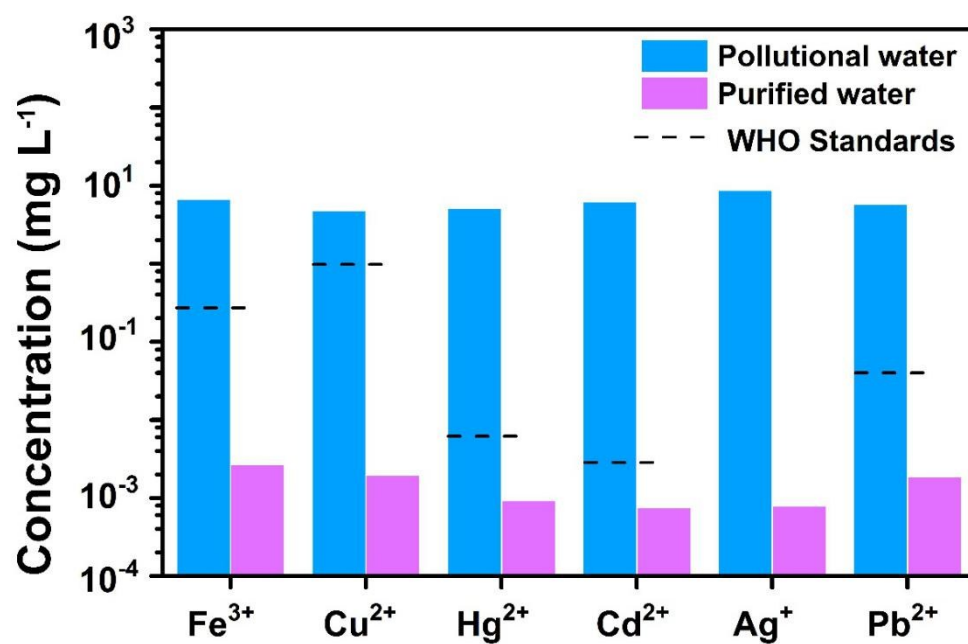

**Fig. S15** Evaluated the performance pollution water purification by measuring the heavy ions before and after solar water purification.

**Table S2.** Evaporation rate of recently reported solar steam generation materials measured under 1 sun irradiation.

| Materials                                     | Evaporation rate<br>(kg m <sup>-2</sup> h <sup>-1</sup> ) | Efficiency<br>(%) | Reference                                                |
|-----------------------------------------------|-----------------------------------------------------------|-------------------|----------------------------------------------------------|
| <b>PAN</b>                                    | <b>2.7</b>                                                | <b>79.3</b>       | <b>This work</b>                                         |
| Ti <sub>3</sub> C <sub>2</sub> MXene membrane | 1.31                                                      | 71                | <i>J. Mater. Chem. A</i> , <b>2018</b> , 6, 16196–16204  |
| Wood                                          | 0.8                                                       | 75.1              | <i>Energy Environ Sci.</i> <b>2019</b> , 12, 1558-1567   |
| Three-dimensional MXene                       | 1.41                                                      | 88.7              | <i>J. Mater. Chem. A</i> , <b>2019</b> , 7, 10446–10455  |
| Mushroom                                      | 1.475                                                     | 78                | <i>Adv. Mater.</i> <b>2017</b> , 29, 1606762             |
| PPy-coated SS mesh                            | 0.92                                                      | 58                | <i>Adv. Mater.</i> <b>2015</b> , 27, 4889-4894           |
| Carbon Sponges                                | 1.39                                                      | 90                | <i>Adv. Energy Mater.</i> <b>2018</b> , 8, 1702149.      |
| Ag/diatomite&filter paper                     | 1.39                                                      | 92.2              | <i>J. Mater. Chem. A</i> , <b>2017</b> , 5, 17817-17821. |
| PVA–PPy-Chitosan                              | 3.6                                                       | 92                | <i>Sci. Adv.</i> <b>2019</b> , 5, eaaw5484               |
| CNT/CNC sponges                               | 1.35                                                      | 87.4              | <i>Adv. Energy Mater.</i> <b>2019</b> , 9, 1900250       |
| Graphene Oxide-Based Aerogels                 | 1.395                                                     | 83                | <i>Adv. Mater.</i> <b>2017</b> , 29, 1604031             |
| Ti <sub>2</sub> O <sub>3</sub> nanoparticles  | 1.3                                                       | 92                | <i>Adv. Mater.</i> <b>2017</b> , 29, 1603730             |

|                                |       |      |                                                       |
|--------------------------------|-------|------|-------------------------------------------------------|
| MoS <sub>2</sub> hybrid film   | 1.1   | 91.5 | <i>Adv. Funct. Mater.</i> <b>2018</b> , 28, 1704505   |
| Graphene/CE membrane           | 1.62  | 86.5 | <i>ACS Nano</i> <b>2017</b> , 11, 5087-5093           |
| Au&CNT integrated freestanding | 1.233 | 82   | <i>ACS Energy Lett.</i> , <b>2018</b> , 3, 1165-1171. |
| Au/silica aerogel              | 1.356 | 85   | <i>Adv. Energy Mater.</i> , <b>2018</b> , 8, 1800711. |

---

## **Section 5. References.**

- 1 X. Ye, C. Zheng, J. Chen, Y. Gao, and C. B. Murray, *Nano Lett.*, 2013, **13**, 765.
